# Supplementary material for: Production of glycosylphosphatidylinositol-anchored proteins for vaccines and directed binding of immunoliposomes to specific cell types
Source: PubMed Central journal article supplement (PMC7401668; doi:10.1590/1678-9199-jvatitd-2020-0032), 2020-08-03
Supplement: 1678-9199-jvatitd-26-e20200032-s1.pdf [file 1678-9199-jvatitd-26-e20200032-s1.pdf]

## Supplementary Material to “Production of glycosylphosphatidylinositol-anchored proteins for vaccines and directed binding of immunoliposomes to specific cell types”

**Additional file 1.** Sequences of the synthesized ZZ-domain and of oligonucleotides used for murine CD14 amplification (introduced restriction sites are underlined).

Duplicated ZZ domain/Strep Tag:

ggatccTGGTCCCACCCTCAGTTCGAGAAGgtggacaacaagttcaataaggagcagcagaacgctttctacgagatcctg  
cacctgccaacctgaacgaggagcaacggaacgccttcatccagagcctgaaggatgaccaagccagagcgccaacctgctggctgaggcc  
aagaagctgaacgacgccaggcccctaagggcggggctcagataataatttaacaaggagcagcagaacgccttctacgagatcctgcatctccc  
taatctgaatgaagagcagcgcaacgccttcatccagagcctcaaggacgatcccagccagagcgctaactctgctcgccgaagctaagaaactca  
atgatgctcaggctccaaggaattc

mCD14-GPI domain primers

GPI Forward

gaattcgactggcccagtcagctaac

GPI reverse

gcggccgcttaacaaagagcgatctcctaggag
